# Supplementary material for: Pre-conception maternal helminth infection transfers via nursing long-lasting cellular immunity against helminths to offspring
Source: PubMed Central journal article supplement — Sci Adv. 2019 May 29;5(5):eaav3058. doi: 10.1126/sciadv.aav3058 (PMC6587632; doi:10.1126/sciadv.aav3058), 2019-05-29
Supplement: aav3058_SM.pdf [file aav3058_SM.pdf]

## Supplementary Materials for

### **Pre-conception maternal helminth infection transfers via nursing long-lasting cellular immunity against helminths to offspring**

Matthew G. Darby, Alisha Chetty, Dunja Mrjden, Marion Rolot, Katherine Smith, Claire Mackowiak, Delphine Sedda, Donald Nyangahu, Heather Jaspan, Kai-Michael Toellner, Ari Waisman, Valerie Quesniaux, Bernhard Ryffel, Adam F. Cunningham, Benjamin G. Dewals, Frank Brombacher\*, William G. C. Horsnell\*

\*Corresponding author. Email: [wghorsnell@gmail.com](mailto:wghorsnell@gmail.com) (W.G.C.H.); [brombacherfrank@gmail.com](mailto:brombacherfrank@gmail.com) (F.B.)

Published 29 May 2019, *Sci. Adv.* **5**, eaav3058 (2019)

DOI: 10.1126/sciadv.aav3058

#### **This PDF file includes:**

Fig. S1. Offspring acquire, via nursing, a population of maternally derived CD4 T cells with a heightened T<sub>H</sub>2 responsiveness following *Nb* infection.

Fig. S2. Offspring nursed on *Hp*-infected mothers do not demonstrate maternal cell transfer.

Fig. S3. Allogeneic *NbM* offspring have raised numbers of maternally derived lung CD4<sup>+</sup> T cells following *Nb* infection.

Fig. S4. Offspring acquire, via nursing, persistent protection from *Nb* related to raised T<sub>H</sub>2 CD4<sup>+</sup> T cell responses following *Nb* infection in an allogeneic setting.

## SUPPLEMENTARY FIGURES

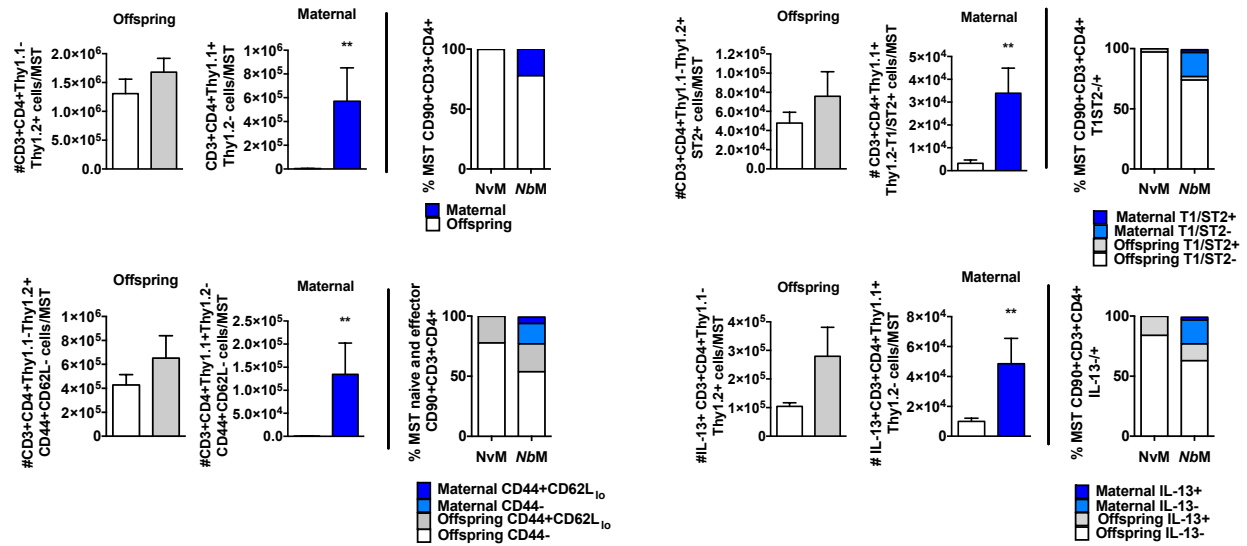

**Fig. S1. Offspring acquire, via nursing, a population of maternally derived CD4 T cells with a heightened  $T_H2$  responsiveness following *Nb* infection.** 3-day-old NvM Thy1.2+ pups were fostered by Thy1.1+ NvM/NbM wildtype dams. 8-week-old NvM Thy1.2+ mice that had been fostered on either NvM or NbM Thy1.1+ dams were infected with 500xL3 *Nb* and killed day 5 PI. Numbers and proportions of offspring endogenous (Thy1.2+Thy1.1-) and maternally derived (Thy1.1+Thy1.2-) MST Thy1+CD3+CD4+, T1/ST2+, IL-13+ and CD44+CD62L<sub>lo</sub> expressing T cell populations were established. All data is representative of a minimum of 2 experimental repeats. \*P<0.05, \*\*P<0.01.

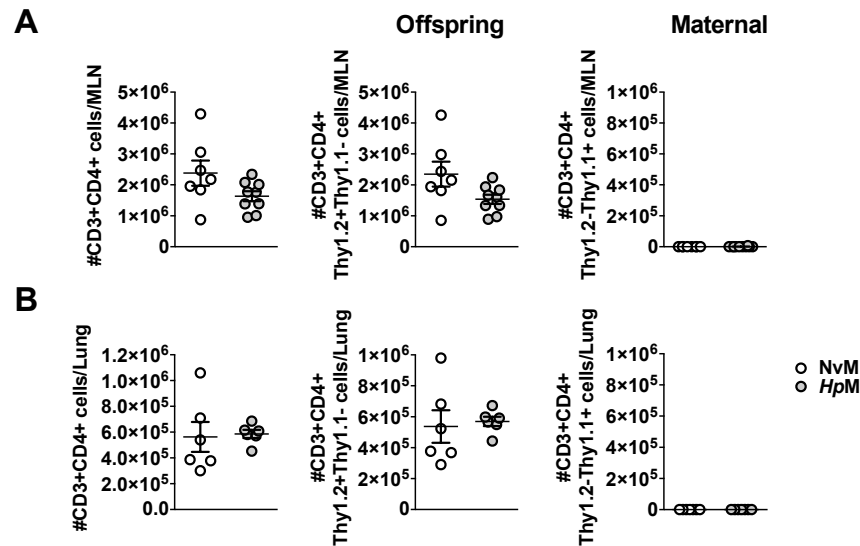

**Fig. S2. Offspring nursed on *Hp*-infected mothers do not demonstrate maternal cell transfer.** 3-day-old NvM Thy1.2+ pups were fostered by Thy1.1+ NvM/*Hp*M wildtype dams. 8-week-old NvM Thy1.2+ mice that had been fostered by either NvM or *Hp*M Thy1.1+ dams were infected with 200 *Hp* third stage larvae and killed day 17 PI. Numbers of offspring endogenous (Thy1.2+Thy1.1-) and maternally derived (Thy1.1+Thy1.2-) MLN (A) and lung (B) Thy1+CD3+CD4+ expressing T cell populations. Data is representative of 1 experimental repeat. \*P<0.05, \*\*P<0.01.

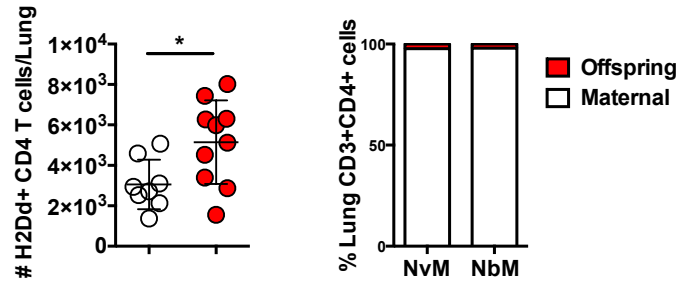

**Fig. S3. Allogeneic *NbM* offspring have raised numbers of maternally derived lung CD4<sup>+</sup> T cells following *Nb* infection.** 3-day-old NvM C57/Bl6 (H-2Db) pups were fostered on NvM (white circles) or *NbM* (red circles) BALB/c (H2-Dd) dams before being infected when 8 weeks old with 500xL3 *Nb* and killed at day 5 PI (Fig. 5a). Numbers of maternally derived lung CD3+CD4+ H2-Dd+ expressing T cell populations were quantified in offspring. All data is representative of 2 experimental repeats. \*P<0.05.

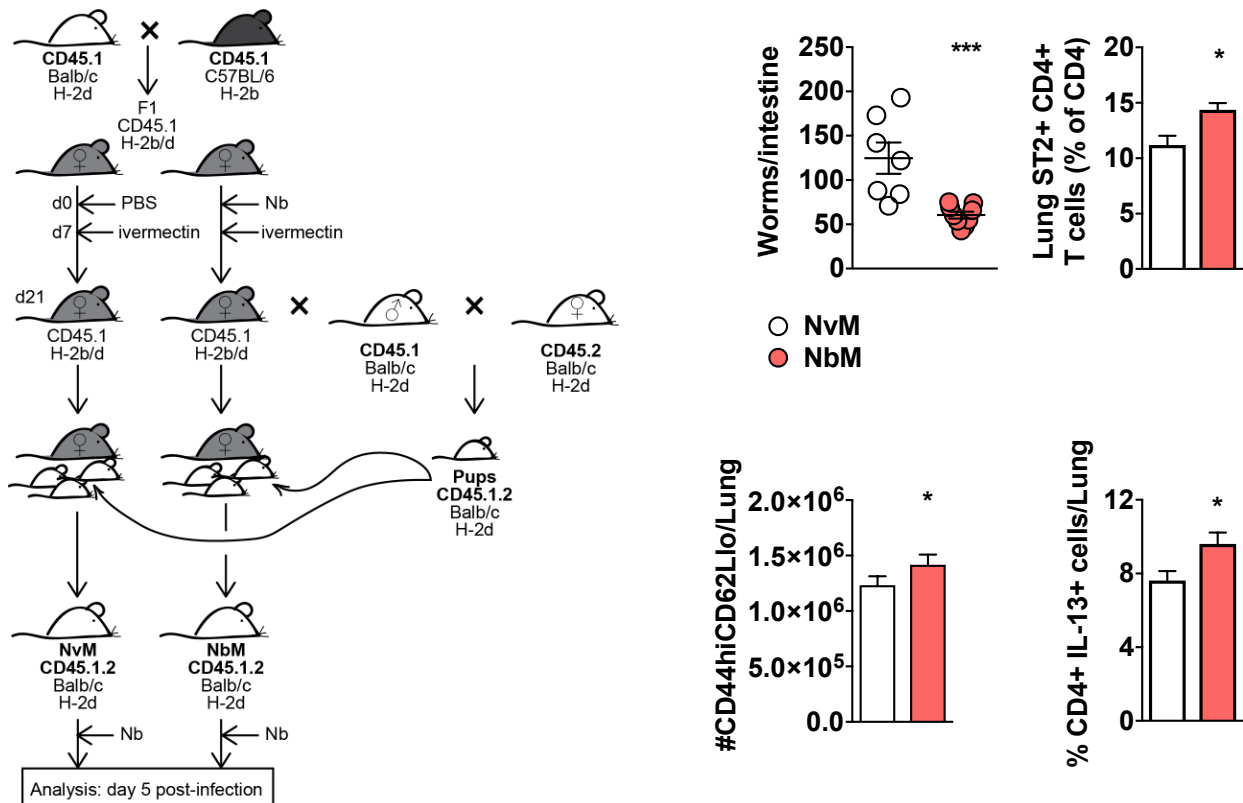

**Fig. S4. Offspring acquire, via nursing, persistent protection from *Nb* related to raised T<sub>H</sub>2 CD4<sup>+</sup> T cell responses following *Nb* infection in an allogeneic setting.** BALB/c (CD45.1, H-2d) mice were crossed with C57BL/6 (CD45.1, H-2b) mice giving a F1 generation of mixed background (CD45.1, H-2b/d) mice. BALB/c (CD45.1, H-2d) mice were crossed with BALB/c (CD45.2, H-2d) mice giving a F1 generation of (CD45.1.2, H-2d) mice. 3-day-old NvM (CD45.1.2, H-2d) pups were fostered on NvM or *NbM* (CD45.1, H-2b/d) dams before being infected when 8 weeks old with 500xL3 *Nb* and killed day 5 PI. Intestinal worm burdens at day 5 PI in 8-week-old mice born to either NvM or *NbM* were established. Numbers of lung ST2+, IL-13+ and CD44+CD62L<sub>lo</sub> CD4+ T cells were quantified. Data is representative of a single experiment. \*P<0.05, \*\*P<0.01, \*\*\*P<0.001.
